# Supplementary material
Source: Elsevier journal article supplement (https://www.sciencedirect.com/science/article/pii/S1699258X20302771)
Supplement: mmc6 [file S1699258X20302771:mmc6.pdf]

| Anexo 6 Tabla de resultados de estudios fármaco-económicos | Estudio | Análisis realizado                                                                                                                                                                                                                                                                                                                                                                                                                                                                                                                |
|------------------------------------------------------------|---------|-----------------------------------------------------------------------------------------------------------------------------------------------------------------------------------------------------------------------------------------------------------------------------------------------------------------------------------------------------------------------------------------------------------------------------------------------------------------------------------------------------------------------------------|
| <b>Crespo</b> <a href="#">[32]</a>                         |         | <ul style="list-style-type: none"> <li>-Ganancia AVAC 5 años 0,103-0,145</li> <li>-Ganancia AVAC vida paciente 0,308-0,396</li> <li>-Coste/AVAC (farmacológicos) 5 años 25.173-35.807 €</li> <li>-Coste/AVAC (farmacológicos) vida paciente 19.056-25.351€</li> <li>-Coste/AVAC (directos) 5 años 29.682-42.175 €/AVAC ganado</li> <li>-Coste/AVAC (directos) vida paciente 22.514-29.848 €/AVAC ganado</li> <li>-Impacto presupuestario 120.000-160.000 pacientes (1º y 5º año, con un 20-24% pacientes en con MTX sc</li> </ul> |
| <b>Fitzpatrick 2011</b> <a href="#">[80]</a>               |         | <ul style="list-style-type: none"> <li>-Impacto anual del tto con MTX sc= 13.342.311 euros (vs 37.618.048 euros de los pacientes que comienzan con el fármaco biológico)</li> <li>-Ahorro en el primer año si se pasa de MTX oral a cs= 24.275.737 euros</li> </ul>                                                                                                                                                                                                                                                               |
| <b>Fitzpatrick 2011_2</b> <a href="#">[81]</a>             |         | <ul style="list-style-type: none"> <li>Costes de los distintos modos de uso del MTX sc</li> <li>-Pac que se inyecta MTX sc en el hospital= 5458 euros</li> <li>-Pac entrenados para auto-administrarse el MTX en 3 visitas= 460 euros</li> <li>-Pac entrenados para auto-administrarse el MTX en 2 visitas= 204</li> <li>-En total, se podrían ahorrar 23.884.083 euros con un sistema de entrenamiento y auto-adminitración a los pac</li> </ul>                                                                                 |
| <b>Lee 2016</b> <a href="#">[82]</a>                       |         | <ul style="list-style-type: none"> <li>Vo= 47.463 dólares</li> <li>Vo→ biol= 212.170</li> <li>Vo→ sc= 59.058</li> <li>Vo→ sc→ Biol= 175.038</li> </ul>                                                                                                                                                                                                                                                                                                                                                                            |
| <b>Mainman 2010</b> <a href="#">[35]</a>                   |         | <ul style="list-style-type: none"> <li>-Inferencia costes: cada 1,000 AR hay 40 con MTX sc, de las que 36 respuesta equivalente anti-TNFα, con lo que el ahorro es de 306.000 libras esterlinas o 300 por paciente-año</li> </ul>                                                                                                                                                                                                                                                                                                 |

Abreviaturas: AVAC= años de vida ajustados por calidad de vida; MTX= metotrexato; pac= pacientes; sc= subcutáneo
